# Supplementary material for: A novel fluorescence and resonance Rayleigh scattering probe based on quantum dots for the detection of albendazole
Source: Royal Society of Chemistry journal article supplement (doi:10.1039/c4ay02289k), 2014-10-28
Supplement: c4ay02289k1.pdf [file c4ay02289k1.pdf]

## A novel fluorescence and resonance Rayleigh scattering probe based on quantum dots for the detection of albendazole

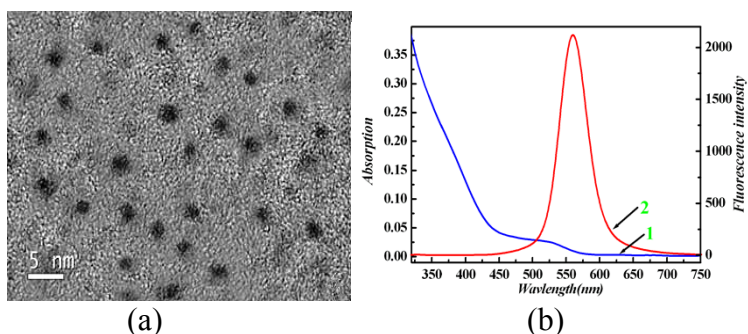

Fig. S1 (a) TEM image, (b) UV-vis absorption (*curve 1*) and fluorescence (*curve 2*) spectra of as-prepared GSH-capped CdTe QDs.

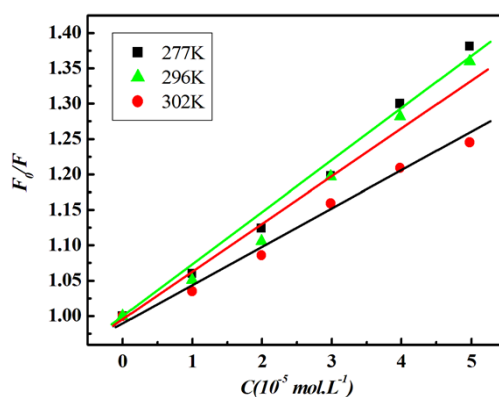

Fig. S2 Stern-Volmer curves for the GSH-capped CdTe QDs-ABZ solution system at three different temperatures (GSH-capped CdTe QDs,  $3.0 \times 10^{-4} \text{ mol.L}^{-1}$ ; PBS buffer solution, 1.0mL, pH=7.1).

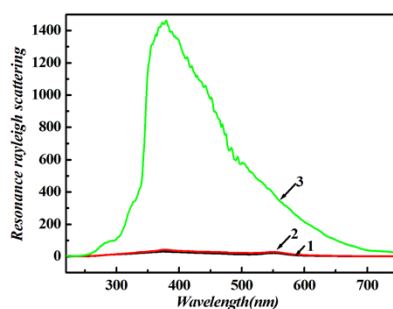

Fig. S3 RRS spectra of GSH-capped CdTe QDs (*curve 1*), ABZ (*curve 2*) and GSH-capped CdTe QDs-ABZ system (*curve 3*). (GSH-capped CdTe QDs:  $3.0 \times 10^{-4} \text{ mol.L}^{-1}$ ; ABZ:  $1.056 \mu\text{g.mL}^{-1}$ ; PBS buffer solution, pH=7.1).
